# Supplementary material for: Good acceptability of HIV, HBV, and HCV screening during immigration medical check-up amongst migrants in France in the STRADA study
Source: PLOS journal article supplement (doi:10.1371/journal.pone.0235260), 2020-06-26
Supplement: S1 (10.1371/journal.pone.0235260.s001) [file journal.pone.0235260.s001]

### Additional file 1: COREQ Guideline checklist

|                                                         |                                                                          |                                                                                                                                                                                                                                                                                                   |
|---------------------------------------------------------|--------------------------------------------------------------------------|---------------------------------------------------------------------------------------------------------------------------------------------------------------------------------------------------------------------------------------------------------------------------------------------------|
| <b>Domain 1 :<br/>Research team<br/>and reflexivity</b> | <b>Personal characteristics</b>                                          |                                                                                                                                                                                                                                                                                                   |
|                                                         | 1. Which author(s) conducted the interview?                              | The interviews were conducted by FT, AFD, SB, IBN, and SL.                                                                                                                                                                                                                                        |
|                                                         | 2. What were the researcher's credentials?                               | MD: Medical Doctor and PhD; FT: PhD in public health, AFD: Medical Doctor and PhD candidate, SB and IBN: Medical doctors, SL: Masters in clinical research, LCB: Medical Doctor and, PhD, FL: Medical Doctor and PhD, SD: Medical Doctor and PhD, TLL: Medical doctor, OC: Medical Doctor and PhD |
|                                                         | 3. What was their occupation at the time of the study?                   | OC, MD, FT, AFD, SL were employed at the research unit; IBN and SB were residents carrying out an internship at the research unit. All other researchers are associate researchers to the research unit.                                                                                          |
|                                                         | 4. Was the researcher male or female?                                    | MD and OC are male, all other authors are female.                                                                                                                                                                                                                                                 |
|                                                         | 5. What experience or training did the researcher have?                  | All researchers have been trained in qualitative research prior to the start of the study.                                                                                                                                                                                                        |
|                                                         | <b>Relationship with participants</b>                                    |                                                                                                                                                                                                                                                                                                   |
|                                                         | 6. Was a relationship established prior to study commencement            | No relationship was established before starting the study.                                                                                                                                                                                                                                        |
|                                                         | 7. What did the participants know about the researcher?                  | Participants didn't know anything about the researchers.                                                                                                                                                                                                                                          |
|                                                         | 8. What characteristics were reported about the interviewer/facilitator? | No characteristics were reported. Participants only knew that the researchers didn't work for OFII.                                                                                                                                                                                               |
| <b>Domain 2: Study design</b>                           | <b>Theoretical framework</b>                                             |                                                                                                                                                                                                                                                                                                   |
|                                                         | 9. What methodological orientation was stated to underpin the study?     | Phenomenological study using grounded theory analysis.                                                                                                                                                                                                                                            |
|                                                         | <b>Participant selection</b>                                             |                                                                                                                                                                                                                                                                                                   |
|                                                         | 10. How were the participants selected?                                  | All adult participants who agreed to participate and understood the study goals were selected.                                                                                                                                                                                                    |
|                                                         | 11. How were the participants approached?                                | Two different approaches were used, depending on the OFII centre in which the study was carried out. The two approaches                                                                                                                                                                           |

|                                            |                                                                                     |                                                                                                                                                   |
|--------------------------------------------|-------------------------------------------------------------------------------------|---------------------------------------------------------------------------------------------------------------------------------------------------|
|                                            |                                                                                     | are described in the methodology section.                                                                                                         |
|                                            | 12. How many participants were in the study?                                        | There are 34 participants in the study.                                                                                                           |
|                                            | 13. How many participants refused to participate or dropped out? Why?               | Two participants explicitly refused to take part in interviews. Reasons are detailed in the results section of the article.                       |
|                                            | <b>Setting</b>                                                                      |                                                                                                                                                   |
|                                            | 14. Where was the data collected?                                                   | The interviews were carried out in a private space in an OFII centre.                                                                             |
|                                            | 15. Was anyone else present besides the participants and researcher?                | Some interviews were conducted with two researchers.                                                                                              |
|                                            | 16. What are the important characteristics of the sample?                           | Participants are a diverse sample of migrants undertaking the medical check-up at OFII                                                            |
|                                            | <b>Data collection</b>                                                              |                                                                                                                                                   |
|                                            | 17. Were questions, prompts, guides provided by the author?<br>Was it pilot tested? | The questions were asked following an interview guide. The interview guide was prepared in the whole team. It was pilot tested then adjusted.     |
|                                            | 18. Were repeat interviews carried out? Details                                     | No repeat interviews were carried out.                                                                                                            |
|                                            | 19. Did the researcher use audio or visual recording to collect the data?           | All interviews were audio recorded with the consent of the participants.                                                                          |
|                                            | 20. Were field notes made during and/or after the interview or focus group?         | Notes were taken during interviews.                                                                                                               |
|                                            | 21. What was the duration of interviews or focus groups?                            | The interviews lasted between 6 and 45 minutes, with an average of 15 minutes.                                                                    |
|                                            | 22. Was data saturation discussed?                                                  | Data saturation was discussed with the entire team of researchers.                                                                                |
|                                            | 23. Were transcripts returned to participants for comments and/or correction?       | No transcripts were returned to participants.                                                                                                     |
| <b>Domain 3:<br/>Analysis and findings</b> | <b>Data analysis</b>                                                                |                                                                                                                                                   |
|                                            | 24. How many data coders coded the data?                                            | The original coding tree was created with the entire team of researchers. Then, two researchers (IBN and SB) independently coded the transcripts. |

|  |                                                                                                             |                                                           |
|--|-------------------------------------------------------------------------------------------------------------|-----------------------------------------------------------|
|  | 25. Did authors provide a description of the coding tree?                                                   | The coding tree is not described.                         |
|  | 26. Were themes identified in advance or derived from the data?                                             | Themes were derived from data.                            |
|  | 27. What software, if applicable, was used to manage the data?                                              | Researchers coded using the NVivo 10 software.            |
|  | 28. Did participants provide feedback on the findings?                                                      | The participants didn't provide feedback on the findings. |
|  | <b>Reporting</b>                                                                                            |                                                           |
|  | 29. Were participant quotations presented to illustrate the themes/findings? Was each quotation identified? | Some participants quote are added to illustrate findings. |
|  | 30. Was there consistency between the data presented and the findings?                                      | The data presented and the findings are consistent.       |
|  | 31. Were major themes clearly presented in the findings?                                                    | The major themes are presented in the findings.           |
|  | 32. Is there a description of diverse cases or discussion of minor themes?                                  | Minor themes are discussed.                               |
